# Supplementary material
Source: PubMed Central journal article supplement (PMC6108847)
Supplement: EHP2920.s001.acco.pdf [file EHP2920.s001.acco.pdf]

**Note to readers with disabilities:** *EHP* strives to ensure that all journal content is accessible to all readers. However, some figures and Supplemental Material published in *EHP* articles may not conform to [508 standards](#) due to the complexity of the information being presented. If you need assistance accessing journal content, please contact [ehp508@niehs.nih.gov](mailto:ehp508@niehs.nih.gov). Our staff will work with you to assess and meet your accessibility needs within 3 working days.

### **Supplemental Material**

#### **A Suspect Screening Method for Characterizing Multiple Chemical Exposures among a Demographically Diverse Population of Pregnant Women in San Francisco**

Aolin Wang, Roy R. Gerona, Jackie M. Schwartz, Thomas Lin, Marina Sirota, Rachel Morello-Frosch, and Tracey J. Woodruff

#### **Table of Contents**

**Table S1.** A list of compounds that correspond to multiple chemical classes per chemical formula in our environmental organic acid (EOA) database.

**Table S2.** Raw and adjusted *P* values of suspect environmental organic acids (EOAs) by demographic characteristics, serum samples from pregnant women at delivery (N=75).

**Table S3.** Selected chemical formula, suspect features from the sample, and the corresponding candidate chemicals for confirmation analysis.

**Figure S1.** Illustration of many (suspect features)-to-many (chemicals) matching. When isomers are present, we could detect multiple chemical features via high-resolution mass spectrometry, indicated by the same (allowing for small measurement error) mass and different retention time. Each of these features can be matched to multiple suspect candidates with the same chemical mass (*i.e.*, formula) included in our EOA database (with equal probability). The exact match between a specific suspect feature and its chemical identity will need to be confirmed using synthetic reference standards.

**Figure S2.** Overview of 455 suspect environmental organic acids (EOAs) detected in 75 serum samples by retention time and mass, colored by matched chemical class.

**Figure S3.** Relative concentration of suspect environmental organic acids (EOAs) with detection  $\geq 60$  that differed by education (A-D) or income (E) before multiple comparison adjustment at 0.1 level using the Kruskal-Wallis Rank Sum test (N=75). Matched chemicals from the EOA database are listed below the chemical formula and mean retention time (RT) of each suspect. The black line in the middle of the box represents median value. The top and bottom lines (also called “hinges”) of each box represent the third quartile (75<sup>th</sup> percentile) and the first quartile (25<sup>th</sup> percentile) respectively. The height of the box represents the interquartile range (IQR) – distance between the first and third quartiles. The upper whisker extends from the upper hinge to the largest value no further than  $1.5 \times \text{IQR}$  from the hinge. The lower whisker extends from the lower hinge to the smallest value at most  $1.5 \times \text{IQR}$  of the hinge. Data beyond the end of the whiskers are called "outlying" points and are plotted individually as small circles.

**Additional file-** Code and data zip Document

## Supplemental Tables

**Table S1.** A list of compounds that correspond to multiple chemical classes per chemical formula in our environmental organic acid (EOA) database

| Chemical formula (n=9) | Compound name (n=25)                    | Chemical class                  | # of chemical classes per formula |
|------------------------|-----------------------------------------|---------------------------------|-----------------------------------|
| <b>C10H12O2</b>        | Carbofuran                              | Phenolic pesticides             | 2                                 |
|                        | Eugenol                                 | Phenols                         |                                   |
| <b>C12H10N2O</b>       | 4-(Phenylazo)phenol                     | Phenols                         | 2                                 |
|                        | Fenazox                                 | Acidic pesticides               |                                   |
| <b>C12H7Br3O2</b>      | 4-(2,4,6-Tribromo-phenoxy)phenol        | Phenols                         | 2                                 |
|                        | Monohydroxy tribromodiphenyl ether      | OH-BDEs                         |                                   |
| <b>C12H7Cl3O2</b>      | 2,4,4'-Trichloro-2'-hydroxyphenyl ether | Phenols                         | 2                                 |
|                        | Hydroxy trichlorobiphenyl               | OH-PCBs                         |                                   |
| <b>C13H15N3O3</b>      | Imazapyr                                | Acidic pesticides               | 2                                 |
|                        | Pyrolan metabolite                      | Predicted pesticide metabolites |                                   |
| <b>C6H4Cl2O</b>        | 1,4-Dichlorobenzene metabolite          | Predicted pesticide metabolites | 2                                 |
|                        | 2,3-Dichlorophenol                      | Phenols                         |                                   |
|                        | 2,4-Dichlorophenol                      | Phenols                         |                                   |
|                        | 2,5-Dichlorophenol                      | Phenols                         |                                   |
|                        | 2,6-Dichlorophenol                      | Phenols                         |                                   |
|                        | 3,4-Dichlorophenol                      | Phenols                         |                                   |
| <b>C8H8O3</b>          | 2,4-Dihydroxyphenone                    | Phenols                         | 2                                 |
|                        | Methyl paraben                          | Phenols                         |                                   |
|                        | Phenoxyacetic acid                      | Acidic pesticides               |                                   |
| <b>C9H10O3</b>         | Dioxacarb artifact                      | Phenolic pesticides             | 2                                 |
|                        | Ethyl-p-hydroxybenzoate (Ethyl paraben) | Phenols                         |                                   |
| <b>C12H10O</b>         | 2-Phenylphenol                          | Phenolic pesticides             | 3                                 |
|                        | 3-Phenylphenol                          | Phenols                         |                                   |
|                        | 4-Phenylphenol                          | Phenols                         |                                   |
|                        | Biphenyl metabolite                     | Predicted pesticide metabolites |                                   |

**Table S2.** Raw and adjusted *P* values of suspect environmental organic acids (EOAs) by demographic characteristics, serum samples from pregnant women at delivery (N=75)

| Formula, RT       | Matched chemical names                                                                                                                       | Race (n=67) <sup>a</sup> |                   | Education (n=71) |                   | Income (n=72) |                   |
|-------------------|----------------------------------------------------------------------------------------------------------------------------------------------|--------------------------|-------------------|------------------|-------------------|---------------|-------------------|
|                   |                                                                                                                                              | Raw <i>P</i>             | Adjusted <i>P</i> | Raw <i>P</i>     | Adjusted <i>P</i> | Raw <i>P</i>  | Adjusted <i>P</i> |
| C6H4Cl2O, 4.067   | 1,4-Dichlorobenzene metabolite<br>2,3-Dichlorophenol<br>2,4-Dichlorophenol<br>2,5-Dichlorophenol<br>2,6-Dichlorophenol<br>3,4-Dichlorophenol | <0.001                   | <0.001            | <0.001           | <0.001            | <0.001        | <0.001            |
| C6HF13O3S, 5.058  | Perfluorohexanesulfonic acid                                                                                                                 | <0.001                   | <0.001            | 0.025            | 0.115             | 0.004         | 0.079             |
| C9H6O3, 1.204     | 4-Hydroxycoumarin                                                                                                                            | 0.079                    | 0.536             | 0.003            | 0.046             | 0.566         | 0.965             |
| C14H18O4, 3.397   | Monohexyl phthalate<br>Monoisohexyl phthalate                                                                                                | 0.508                    | 0.900             | 0.006            | 0.046             | 0.290         | 0.965             |
| C14H21NO2S, 0.787 | Prosulfocarb metabolite                                                                                                                      | 0.558                    | 0.900             | 0.006            | 0.046             | 0.346         | 0.965             |
| C15H20O4, 3.594   | Monoheptyl phthalate<br>Monoisohexyl phthalate                                                                                               | 0.668                    | 0.906             | 0.003            | 0.046             | 0.198         | 0.918             |
| C16H18N2O4, 4.207 | Difenoxuron metabolite                                                                                                                       | 0.656                    | 0.906             | 0.004            | 0.046             | 0.802         | 0.984             |
| C15H20O4, 3.876   | Monoheptyl phthalate<br>Monoisohexyl phthalate                                                                                               | 0.725                    | 0.906             | 0.006            | 0.046             | 0.895         | 0.984             |
| C20H33NO2, 8.198  | Fenpropimorph metabolite                                                                                                                     | 0.764                    | 0.910             | 0.002            | 0.046             | 0.277         | 0.965             |
| C13H15N3O3, 0.858 | Imazapyr<br>Pyrolan metabolite                                                                                                               | 1                        | 1                 | 0.003            | 0.046             | 0.837         | 0.984             |
| C6H4N2O5, 1.579   | 2,4-Dinitrophenol                                                                                                                            | 0.019                    | 0.466             | 0.016            | 0.102             | 0.003         | 0.079             |
| C16H22O4, 5.139   | Mono (2-ethylhexyl) phthalate<br>Monoisooctyl phthalate<br>Monoethyl phthalate                                                               | 0.228                    | 0.659             | 0.048            | 0.160             | 0.005         | 0.079             |
| C11H14O3, 5.074   | Butyl paraben                                                                                                                                | 0.320                    | 0.686             | 0.264            | 0.447             | 0.005         | 0.079             |

Note: Only compounds with detection frequency less than 60 were considered in this analysis. Compounds with detection frequency greater than or equal to 60 were analyzed based on their relative concentration. We further limited this analysis to compounds that were detected in at least 20% of participants with non-missing values for race/ethnicity, education, income, and nativity (U.S.-born status), resulting in 75, 70, 74, and 81 suspect EOAs being included for each demographic comparison respectively. *P*-values were obtained using a Fisher's exact test. We calculated adjusted *p*-values to correct for multiple comparisons for each demographic comparison using the Benjamini–Hochberg procedure (i.e., the false discovery rate method). None of the suspect EOAs differed by nativity due to the limited number of participants who answered this question (n=44) and thus results for nativity were not included in this table.

<sup>a</sup>Analysis was performed on a sample restricted to non-Hispanic whites, Latinas, and Asians only due to small sample sizes of non-Hispanic African Americans and other races.

**Table S3.** Selected chemical formula, suspect features from the sample, and the corresponding candidate chemicals for confirmation analysis

| Formula  | RT <sup>a</sup> | DF <sup>a</sup> | Sel <sup>b</sup> | Confirmed | Selected compound for validation | CAS RN     | HPV <sup>c</sup> | ToxCast <sup>d</sup> | TSCA <sup>e</sup> | RT <sub>Standard</sub> |
|----------|-----------------|-----------------|------------------|-----------|----------------------------------|------------|------------------|----------------------|-------------------|------------------------|
| C10H12O  | 3.498           | 1               |                  | No        | Estragole                        | 140-67-0   | √                | √                    | √                 | NP                     |
|          | 3.823           | 1               |                  | No        |                                  |            |                  |                      |                   |                        |
|          | 4.144           | 29              | √                | No        |                                  |            |                  |                      |                   |                        |
|          | 4.348           | 1               |                  | No        |                                  |            |                  |                      |                   |                        |
| C10H12O2 | 1.499           | 1               |                  | No        | Eugenol                          | 97-53-0    |                  | √                    | √                 | NP                     |
|          | 3.887           | 10              |                  | No        |                                  |            |                  |                      |                   |                        |
|          | 4.072           | 36              | √                | No        |                                  |            |                  |                      |                   |                        |
|          | 4.543           | 3               |                  | No        |                                  |            |                  |                      |                   |                        |
| C10H14O  | 3.815           | 2               |                  | No        | 2-tert-Butylphenol               | 88-18-6    | √                | √                    | √                 | 5.6                    |
|          | 4.029           | 2               |                  | No        | 4-sec-Butylphenol                | 99-71-8    | √                | √                    | √                 | 5.4                    |
|          | 4.246           | 43              | √                | No        |                                  |            |                  |                      |                   |                        |
| C10H14O2 | 2.19            | 1               |                  | No        | 4-Butoxyphenol                   | 122-94-1   |                  |                      | √                 | 5.4                    |
|          | 2.403           | 1               |                  | No        |                                  |            |                  |                      |                   |                        |
|          | 2.926           | 2               |                  | No        |                                  |            |                  |                      |                   |                        |
|          | 4.029           | 70              | √(A)             | No        |                                  |            |                  |                      |                   |                        |
| C11H14O2 | 4.008           | 2               |                  | No        | Methyl eugenol                   | 93-15-2    |                  | √                    | √                 | NP                     |
|          | 4.38            | 2               |                  | No        |                                  |            |                  |                      |                   |                        |
|          | 4.629           | 3               |                  | No        |                                  |            |                  |                      |                   |                        |
|          | 5.129           | 63              | √(A)             | No        |                                  |            |                  |                      |                   |                        |
| C12H18O2 | 0.831           | 2               |                  | No        | 4-Hexyloxyphenol                 | 18979-55-0 |                  | √                    | √                 | 5.8                    |
|          | 3.985           | 9               |                  | No        |                                  |            |                  |                      |                   |                        |
|          | 4.767           | 58              | √                | No        |                                  |            |                  |                      |                   |                        |
|          | 5.27            | 2               |                  | No        |                                  |            |                  |                      |                   |                        |
| C13H20O2 | 1.113           | 1               |                  | No        | 4-Heptyloxyphenol                | 13037-86-0 |                  |                      | √                 | 6.2                    |
|          | 3.863           | 11              |                  | No        |                                  |            |                  |                      |                   |                        |
|          | 4.331           | 21              | √                | No        |                                  |            |                  |                      |                   |                        |
|          | 4.793           | 19              |                  | No        |                                  |            |                  |                      |                   |                        |
|          | 5.276           | 21              |                  | No        |                                  |            |                  |                      |                   |                        |
| C14H22O  | 4.321           | 5               |                  | No        | 2,6-Di-tert-butylphenol          | 128-39-2   | √                | √                    | √                 | 7.25                   |
|          | 4.433           | 9               |                  | No        |                                  |            |                  |                      |                   |                        |
|          | 4.788           | 17              |                  | No        |                                  |            |                  |                      |                   |                        |
|          | 5.066           | 33              |                  | No        |                                  |            |                  |                      |                   |                        |

| Formula  | RT <sup>a</sup> | DF <sup>a</sup> | Sel <sup>b</sup> | Confirmed        | Selected compound for validation           | CAS RN     | HPV <sup>c</sup> | ToxCast <sup>d</sup> | TSCA <sup>e</sup> | RT <sup>Standard</sup> |
|----------|-----------------|-----------------|------------------|------------------|--------------------------------------------|------------|------------------|----------------------|-------------------|------------------------|
|          | 5.153           | 40              |                  | No               |                                            |            |                  |                      |                   |                        |
|          | 5.283           | 38              |                  | No               |                                            |            |                  |                      |                   |                        |
|          | 6.719           | 74              | √(A)             | Yes <sup>f</sup> | 2,4-Di-tert-butylphenol (2,4,-DTBP)        | 96-76-4    | √                | √                    | √                 | 6.75                   |
|          |                 |                 |                  | Yes <sup>f</sup> | 4-tert-Octylphenol                         | 140-66-9   | √                | √                    | √                 | 6.5                    |
| C15H22O3 | 3.791           | 1               |                  | No               |                                            |            |                  |                      |                   |                        |
|          | 4.537           | 8               |                  | No               |                                            |            |                  |                      |                   |                        |
|          | 5.132           | 64              | √                | Yes              | 3,5-Di-tert-Butylsalicylic acid            | 19715-19-6 |                  |                      | √                 | 5.3                    |
| C16H26O2 | 4.191           | 6               |                  | No               | 4-tert-Octylphenol monoethoxylate solution | 2315-67-5  |                  |                      |                   | NP                     |
|          | 4.545           | 3               |                  | No               |                                            |            |                  |                      |                   |                        |
|          | 4.779           | 5               |                  | No               |                                            |            |                  |                      |                   |                        |
|          | 6.153           | 61              | √(A)             | No               |                                            |            |                  |                      |                   |                        |
| C6H4N2O5 | 0.579           | 8               |                  | No               |                                            |            |                  |                      |                   |                        |
|          | 1.579           | 52              | √(A)             | Yes              | 2,4-Dinitrophenol (2,4-DNP)                | 51-28-5    | √                | √                    | √                 | 1.6~2.0                |
| C6H6O2   | 0.942           | 33              |                  | No               |                                            |            |                  |                      |                   |                        |
|          | 1.352           | 39              | √                | Yes              | Pyrocatechol                               | 120-80-9   | √                | √                    | √                 | 1.49                   |
|          | 2.364           | 2               |                  | No               |                                            |            |                  |                      |                   |                        |
| C7H8O    | 0.893           | 3               |                  | No               | 2-Methylphenol                             | 95-48-7    | √                | √                    | √                 | 4.2                    |
|          | 1.75            | 1               |                  | No               | 4-Methylphenol                             | 106-44-5   | √                | √                    | √                 | 4.4                    |
|          | 1.999           | 70              | √                | No               |                                            |            |                  |                      |                   |                        |
|          | 3.239           | 1               |                  | No               |                                            |            |                  |                      |                   |                        |
|          | 3.587           | 1               |                  | No               |                                            |            |                  |                      |                   |                        |
|          | 4.357           | 1               |                  | No               |                                            |            |                  |                      |                   |                        |
| C8H8O2   | 1.039           | 54              | √                | No               |                                            |            |                  |                      |                   |                        |
|          | 1.555           | 1               |                  | No               |                                            |            |                  |                      |                   |                        |
|          | 2.489           | 2               |                  | No               |                                            |            |                  |                      |                   |                        |
|          | 3.027           | 17              |                  | No               |                                            |            |                  |                      |                   |                        |
|          | 3.422           | 6               |                  | Yes <sup>g</sup> | 2-Hydroxyacetophenone                      | 118-93-4   |                  | √                    | √                 | 3.3                    |
|          |                 |                 |                  | Yes <sup>g</sup> | 3'-Hydroxyacetophenone                     | 121-71-1   |                  |                      | √                 | 3.3                    |
|          | 4.051           | 15              |                  | No               |                                            |            |                  |                      |                   |                        |
| 5.024    | 6               |                 | No               |                  |                                            |            |                  |                      |                   |                        |
| C8H8O3   | 1.187           | 15              |                  | No               | Phenoxyacetic Acid                         | 122-59-8   |                  | √                    | √                 | 0.86                   |
|          | 1.931           | 66              | √(A)             | No               |                                            |            |                  |                      |                   |                        |
|          | 2.393           | 2               |                  | No               |                                            |            |                  |                      |                   |                        |
|          | 3.888           | 35              |                  | No               |                                            |            |                  |                      |                   |                        |
|          | 4.273           | 1               |                  | No               |                                            |            |                  |                      |                   |                        |

| Formula | RT <sup>a</sup> | DF <sup>a</sup> | Sel <sup>b</sup> | Confirmed | Selected compound for validation | CAS RN    | HPV <sup>c</sup> | ToxCast <sup>d</sup> | TSCA <sup>e</sup> | RT <sub>Standard</sub> |
|---------|-----------------|-----------------|------------------|-----------|----------------------------------|-----------|------------------|----------------------|-------------------|------------------------|
| C9H6O3  | 0.927           | 1               |                  | Yes       | 4-Hydroxycoumarin                | 1076-38-6 |                  |                      | √                 | 0.8                    |
|         | 1.204           | 20              | √(A)             | No        |                                  |           |                  |                      |                   |                        |

Abbreviations: EOA, environmental organic acid; DF, detection frequency; RT, retention time (mean); HPV, high production volume; RT<sub>standard</sub>, retention time of the corresponding reference standard obtained from the QTOF validation analysis; NP, not present.

Note: confirmed compounds are highlighted in blue. Information on each suspect EOA (unique combination of formula and mean RT) is listed in the first four columns. The columns that were shaded in purple contain information on the selected candidate compound(s) for validation. There can be multiple candidate compounds being selected for validation and we will compare the RT<sub>standard</sub>, accurate mass and MS/MS spectral pattern of a reference standard to that of each of the suspects with the same formula. We confirmed the presence of the suspect EOA if it has the same RT, mass, and MS/MS spectral pattern as that of the corresponding reference standard.

<sup>a</sup>RT (mean) and DF for suspect EOAs detected in our samples.

<sup>b</sup>Suspect EOA selected initially for compound confirmation process. “(A)” annotates compounds that were chosen at the first round because of their high detection (DF $\geq$ 60) and showing potential demographic differences in relative concentration based on raw *p*-values < 0.1 (Supplementary Figure S3) or in detection frequency based on adjusted *p*-values < 0.1 (Supplementary Table S4). Compounds without annotation were chosen at subsequent rounds according to their rank order of detection frequency.

<sup>c</sup>Chemicals being manufactured and/or imported into the US with an aggregate volume of 1 million to 10 million pounds/year, according to the US HPV list by US Environmental Protection Agency (2004).

<sup>d</sup>Toxicity ForeCaster (ToxCast<sup>TM</sup>) Data: Chemical information database, available at: [ftp://newftp.epa.gov/comptox/High\\_Throughput\\_Screening\\_Data/DSSTox\\_Oct\\_2015](ftp://newftp.epa.gov/comptox/High_Throughput_Screening_Data/DSSTox_Oct_2015)

<sup>e</sup>The Toxic Substances Control Act (TSCA) Chemical Substance Inventory, available at: <https://www.epa.gov/tsca-inventory>

<sup>f</sup>4-tert-Octylphenol has RT very close to 2,4,-DTBP and is currently biomonitored by NHANES. Thus, it is not counted towards confirmed novel compounds.

<sup>g</sup>2-Hydroxyacetophenone or 3'-Hydroxyacetophenone being isomers with very close structures and cannot be distinguished by RT solely in the current LC-QTOF/MS analysis

## Supplemental Figures

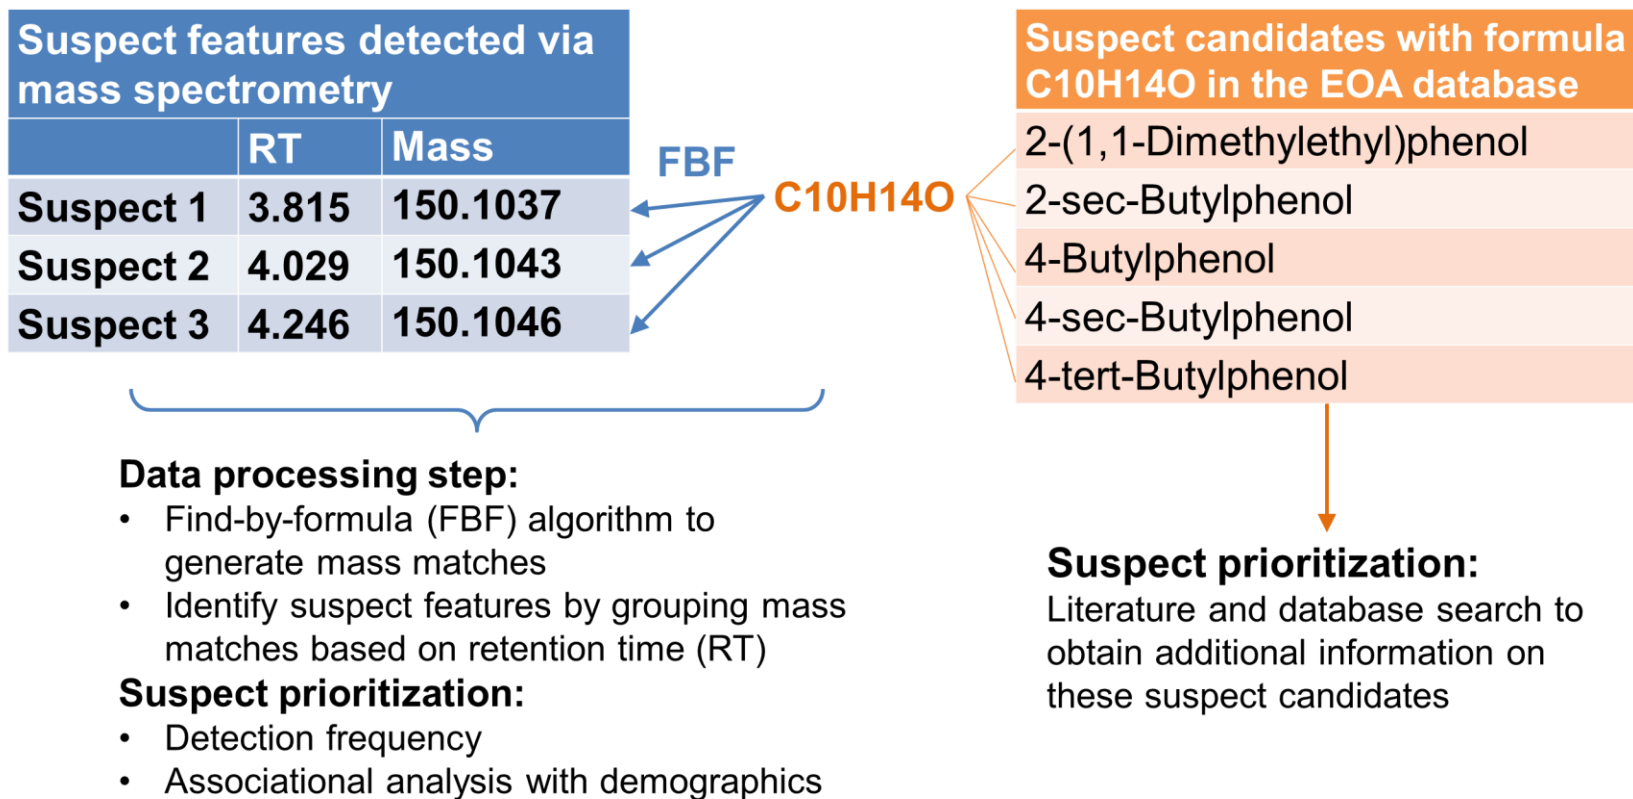

**Figure S1.** Illustration of many (suspect features)-to-many (chemicals) matching. When isomers are present, we could detect multiple chemical features via high-resolution mass spectrometry, indicated by the same (allowing for small measurement error) mass and different retention time. Each of these features can be matched to multiple suspect candidates with the same chemical mass (*i.e.*, formula) included in our EOA database (with equal probability). The exact match between a specific suspect feature and its chemical identity will need to be confirmed using synthetic reference standards.



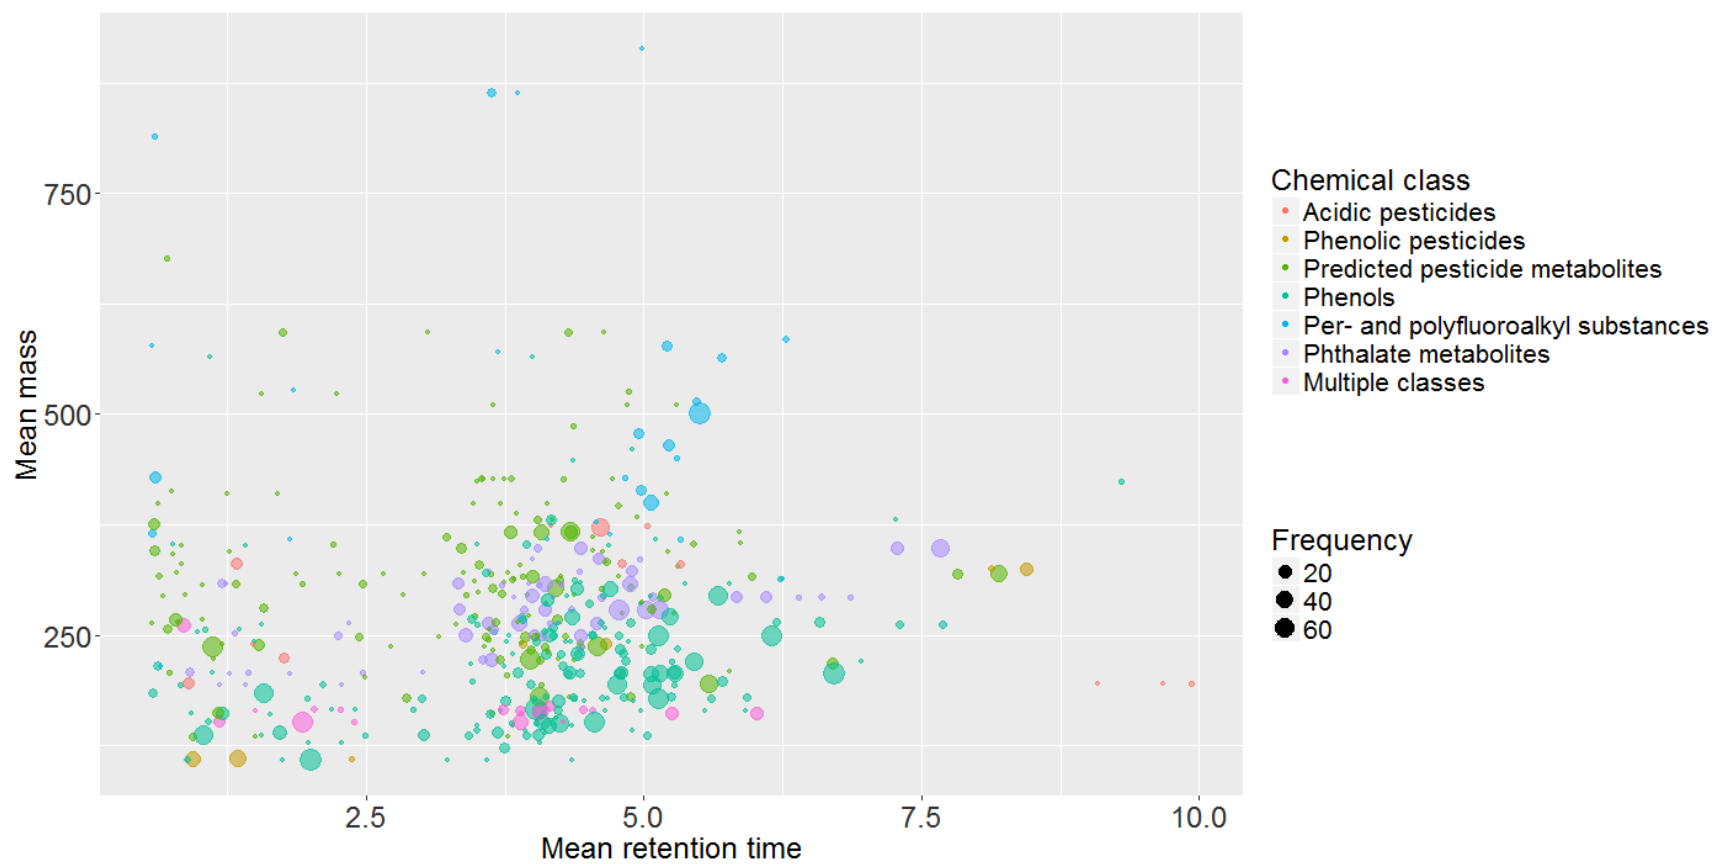

**Figure S2.** Overview of 455 suspect environmental organic acids (EOAs) detected in 75 serum samples by retention time and mass, colored by matched chemical class.

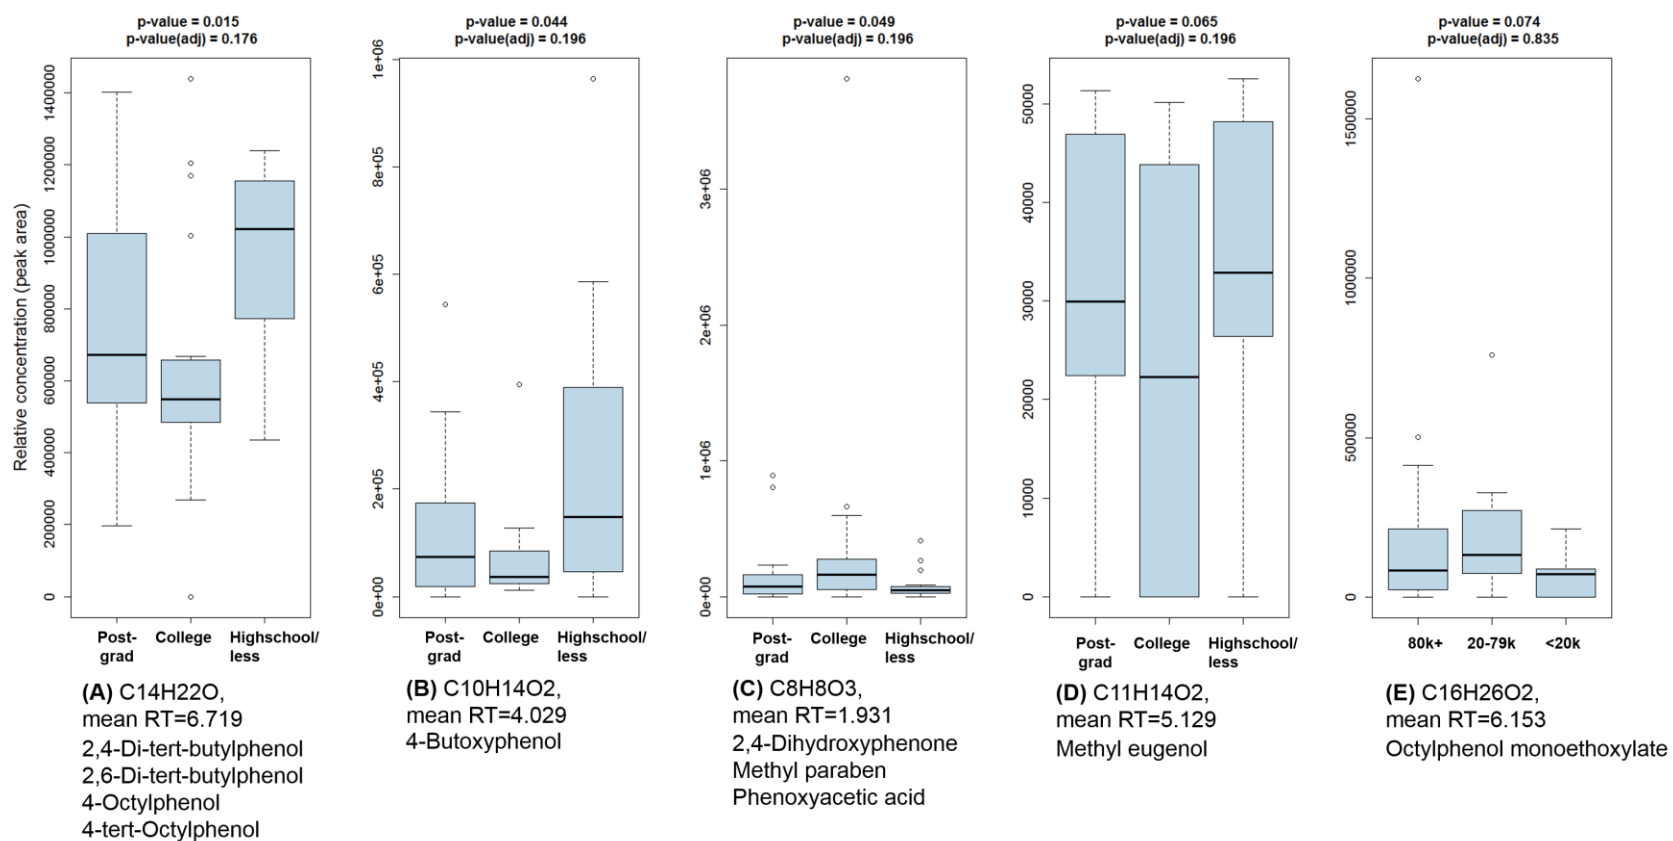

**Figure S3.** Relative concentration of suspect environmental organic acids (EOAs) with detection  $\geq 60$  that differed by education (A-D) or income (E) before multiple comparison adjustment at 0.1 level using the Kruskal-Wallis Rank Sum test (N=75). Matched chemicals from the EOA database are listed below the chemical formula and mean retention time (RT) of each suspect. The black line in the middle of the box represents median value. The top and bottom lines (also called “hinges”) of each box represent the third quartile (75<sup>th</sup> percentile) and the first quartile (25<sup>th</sup> percentile) respectively. The height of the box represents the interquartile range (IQR) – distance between the first and third quartiles. The upper whisker extends from the upper hinge to the largest value no further than  $1.5 \times \text{IQR}$  from the hinge. The lower whisker extends from the lower hinge to the smallest value at most  $1.5 \times \text{IQR}$  of the hinge. Data beyond the end of the whiskers are called “outlying” points and are plotted individually as small circles.
